# Supplementary material for: Ecotoxicological prediction of organic chemicals toward Pseudokirchneriella subcapitata by Monte Carlo approach
Source: Royal Society of Chemistry journal article supplement (doi:10.1039/d2ra03936b), 2022-01-01
Supplement: d2ra03936b1.pdf [file d2ra03936b1.pdf]

Table S1. SMILES of organic chemicals, the set of each compound, their calculated and observed of pEC10 and PEC50, (training (+), invisible training (-), calibration (#) and validation (\*) sets).

| ID | SMILES                                          | pEC10   |         |         |        |        |        | pEC50  |         |         |         |        |        |        |        |
|----|-------------------------------------------------|---------|---------|---------|--------|--------|--------|--------|---------|---------|---------|--------|--------|--------|--------|
|    |                                                 | Split 1 | Split 2 | Split 3 | Expr.  | Prd. 1 | Prd. 2 | Prd. 3 | Split 1 | Split 2 | Split 3 | Expr.  | Prd. 1 | Prd. 2 | Prd. 3 |
| 1  | <chem>c1([N+](=O)[O-])ccc(cc1)N</chem>          | +       | *       | #       | 3.994  | 4.0388 | 3.8463 | 3.5484 | +       | #       | #       | 3.507  | 3.5349 | 3.0177 | 3.613  |
| 2  | <chem>c1(ccccc1)C#N</chem>                      | +       | +       | #       | 3.242  | 2.8753 | 3.3681 | 3.3505 | +       | #       | +       | 2.903  | 3.2193 | 2.7488 | 2.9628 |
| 3  | <chem>c1(Nc2c(ccc2)Cl)nc(nc(n1)Cl)Cl</chem>     | -       | -       | +       | 5.491  | 6.1319 | 5.4552 | 6.1869 | +       | #       | *       | 5.19   | 5.8618 | 5.7377 | 6.0454 |
| 4  | <chem>c1(Oc2ccc(c2)ccc(cc1)Br</chem>            | +       | #       | +       | 6.292  | 5.9912 | 5.9576 | 6.3602 | +       | *       | +       | 5.927  | 5.6642 | 5.7642 | 5.6479 |
| 5  | <chem>c1(Oc2ccc(cc2)Cl)ccc(cc1)N</chem>         | +       | #       | -       | 5.801  | 5.6895 | 4.6564 | 4.9122 | -       | #       | +       | 5.547  | 5.0397 | 5.1009 | 4.6966 |
| 6  | <chem>C1(NC2CCCC2)CCCCC1</chem>                 | +       | +       | *       | 5.707  | 5.5269 | 6.1507 | 5.2558 | +       | *       | *       | 4.524  | 3.7892 | 5.6374 | 4.737  |
| 7  | <chem>c1(Oc2ccc(c2)ccccc1</chem>                | -       | *       | +       | 5.398  | 5.3128 | 4.4799 | 5.3613 | #       | +       | +       | 5.136  | 4.984  | 4.7022 | 4.9205 |
| 8  | <chem>N(CCC)(CCCC)CCO</chem>                    | #       | +       | +       | 3.734  | 4.9453 | 3.994  | 4.0406 | #       | +       | #       | 3.289  | 3.5864 | 4.0011 | 4.0661 |
| 9  | <chem>N(CCC)(CCCC)CCCC</chem>                   | +       | +       | +       | 3.87   | 5.3764 | 4.8435 | 4.5192 | -       | +       | *       | 3.469  | 4.3554 | 4.9119 | 4.3836 |
| 10 | <chem>C(C)CCl</chem>                            | -       | +       | #       | 4.303  | 5.2676 | 4.7454 | 4.2855 | *       | +       | +       | 4.1353 | 3.8584 | 5.159  | 4.9939 |
| 11 | <chem>c1(CNC(C)C)ccccc1</chem>                  | -       | +       | #       | 4.812  | 4.5885 | 4.6909 | 4.4927 | #       | -       | #       | 4.53   | 4.3388 | 3.8341 | 5.133  |
| 12 | <chem>c1(/N=N/c2ccc(c2)ccccc1</chem>            | -       | *       | #       | 5.207  | 5.5888 | 5.2887 | 5.104  | #       | *       | *       | 5.042  | 5.0532 | 5.3059 | 4.3227 |
| 13 | <chem>C1(CO1)CCC=C</chem>                       | -       | -       | #       | 3.703  | 4.2278 | 3.5278 | 3.1948 | +       | -       | -       | 3.367  | 3.592  | 3.4808 | 3.5683 |
| 14 | <chem>c1(/C=C/COC(=O)C)ccccc1</chem>            | -       | *       | +       | 4.317  | 4.6627 | 4.5551 | 4.4298 | *       | #       | #       | 4.1321 | 3.7712 | 2.9179 | 3.9282 |
| 15 | <chem>c1(ccccc1)N=C=S</chem>                    | +       | -       | #       | 5.912  | 5.8009 | 5.3661 | 5.5077 | +       | *       | #       | 5.637  | 6.154  | 5.1604 | 4.675  |
| 16 | <chem>c1(ccccc1)NC(=O)C</chem>                  | *       | +       | +       | 3.1266 | 3.836  | 3.4582 | 3.4798 | +       | *       | -       | 2.655  | 3.263  | 2.9525 | 2.9216 |
| 17 | <chem>c1(ccc(cc1)OC)CCC(=O)C</chem>             | #       | *       | #       | 4.137  | 4.7437 | 3.6437 | 3.9946 | +       | -       | +       | 3.642  | 3.7848 | 4.0967 | 3.6212 |
| 18 | <chem>c1(ccc(cc1)N)CCCCCCCCC</chem>             | -       | #       | -       | 7.105  | 7.7009 | 7.7544 | 6.853  | *       | *       | #       | 6.4784 | 6.7561 | 7.3284 | 6.6878 |
| 19 | <chem>c1(ccccc1)/C=C/CO</chem>                  | *       | +       | +       | 3.3873 | 4.3169 | 3.716  | 4.0246 | *       | *       | -       | 3.0983 | 3.6487 | 3.2481 | 2.8872 |
| 20 | <chem>C(CCC)(CC)CN</chem>                       | #       | +       | +       | 4.074  | 4.4822 | 3.5975 | 4.2491 | #       | #       | #       | 3.651  | 4.0748 | 3.777  | 4.3097 |
| 21 | <chem>c1(ccc(cc1)N)C</chem>                     | +       | -       | #       | 4.65   | 4.3847 | 4.0337 | 3.7152 | -       | +       | +       | 4.439  | 3.9393 | 3.3237 | 3.542  |
| 22 | <chem>C(=O)(CCCC)CC</chem>                      | +       | *       | +       | 3.397  | 4.0785 | 4.0137 | 3.7168 | +       | *       | #       | 3.176  | 3.3663 | 3.5031 | 3.4406 |
| 23 | <chem>C(Cl)C</chem>                             | *       | *       | *       | 4.0781 | 4.9406 | 4.7388 | 4.4758 | *       | *       | -       | 3.7533 | 4.3462 | 4.3771 | 3.9622 |
| 24 | <chem>C(C)N)C</chem>                            | -       | #       | #       | 3.192  | 3.5032 | 3.6524 | 3.7814 | -       | *       | +       | 2.885  | 2.9593 | 2.7593 | 2.9537 |
| 25 | <chem>C(=C)CN</chem>                            | #       | -       | *       | 2.499  | 3.2206 | 3.0244 | 3.1066 | *       | +       | -       | 2.0948 | 2.7465 | 2.7485 | 2.5838 |
| 26 | <chem>C(OC(=O)CCl)(C)(C)C</chem>                | +       | +       | -       | 5.923  | 4.6472 | 5.3016 | 4.5477 | +       | +       | +       | 5.506  | 3.4576 | 3.9316 | 4.3047 |
| 27 | <chem>C(C(C)C)CN</chem>                         | +       | *       | -       | 3.095  | 3.7505 | 3.4948 | 3.6615 | +       | #       | -       | 2.355  | 3.0462 | 3.0873 | 3.1794 |
| 28 | <chem>C(C(=O)C)CC</chem>                        | -       | *       | +       | 1.99   | 3.2846 | 2.6241 | 3.0374 | *       | *       | *       | 1.6587 | 2.5812 | 2.4361 | 2.127  |
| 29 | <chem>C(C(=O)O)CN</chem>                        | *       | +       | -       | 4.1574 | 2.624  | 2.4076 | 2.9092 | +       | +       | +       | 2.977  | 1.9929 | 2.0001 | 1.5597 |
| 30 | <chem>C(OC(C)C)Cl)(C)(C)Cl</chem>               | -       | -       | +       | 3.15   | 3.0327 | 2.7241 | 3.6517 | -       | #       | -       | 2.889  | 1.9832 | 1.3338 | 3.2065 |
| 31 | <chem>C(C)CN</chem>                             | *       | -       | +       | 3.5631 | 3.5456 | 3.102  | 3.578  | *       | +       | *       | 3.0381 | 2.9574 | 2.7204 | 3.1214 |
| 32 | <chem>C(C)C#N</chem>                            | -       | #       | #       | 2.089  | 2.558  | 2.4417 | 2.6932 | *       | -       | +       | 1.7223 | 1.8187 | 1.9283 | 1.7756 |
| 33 | <chem>C(=O)(/C=C/C(=O)O)O</chem>                | -       | -       | -       | 3.474  | 3.5218 | 2.7223 | 2.9495 | -       | *       | *       | 1.989  | 1.6717 | 1.9336 | 1.3106 |
| 34 | <chem>C(CCN)CN</chem>                           | #       | *       | -       | 3.389  | 3.9222 | 3.6148 | 3.5231 | -       | *       | *       | 2.23   | 3.038  | 2.8477 | 3.4774 |
| 35 | <chem>N(CCCN(C)C)(C)C</chem>                    | *       | +       | -       | 3.9686 | 3.7642 | 3.5746 | 4.0708 | -       | *       | *       | 3.583  | 3.7363 | 3.5988 | 3.765  |
| 36 | <chem>C(CNCC(C)C)(C)C</chem>                    | +       | +       | +       | 4.203  | 4.2236 | 4.0449 | 3.3711 | +       | +       | -       | 3.907  | 3.3219 | 3.3574 | 3.678  |
| 37 | <chem>N(CCCCC(C)C)(C)C</chem>                   | #       | *       | -       | 4.838  | 4.5253 | 4.9715 | 5.1569 | *       | *       | +       | 4.5288 | 4.6072 | 4.7358 | 4.8276 |
| 38 | <chem>C(CCC)CCN</chem>                          | -       | *       | +       | 3.964  | 4.3651 | 4.9872 | 3.7099 | #       | -       | #       | 3.607  | 3.4921 | 3.1709 | 3.5717 |
| 39 | <chem>S(CCC)CCC</chem>                          | +       | +       | *       | 3.427  | 3.8901 | 3.4482 | 3.2529 | +       | *       | -       | 3.322  | 3.1536 | 3.2952 | 3.3628 |
| 40 | <chem>C(CCN)CCC</chem>                          | #       | #       | *       | 4.493  | 4.73   | 4.2139 | 4.0362 | +       | *       | -       | 4.313  | 3.9715 | 3.6069 | 4.0845 |
| 41 | <chem>C(CCC=O)CCC</chem>                        | -       | #       | #       | 4.053  | 3.6922 | 4.281  | 3.5597 | #       | *       | *       | 3.798  | 3.3729 | 3.1606 | 3.3781 |
| 42 | <chem>C(CCC)CCCN</chem>                         | #       | -       | +       | 5.07   | 4.9588 | 3.562  | 4.3742 | -       | -       | *       | 4.856  | 4.2285 | 3.9701 | 4.2654 |
| 43 | <chem>C(CCCCl)C(=O)O</chem>                     | *       | +       | *       | 3.615  | 3.3364 | 4.228  | 3.6132 | +       | +       | +       | 2.785  | 2.9423 | 2.3043 | 2.8724 |
| 44 | <chem>C(CCCCC)CCC(=O)Cl</chem>                  | *       | +       | #       | 4.351  | 6.0769 | 4.0968 | 4.8455 | *       | +       | *       | 4.0763 | 4.782  | 4.4645 | 4.8459 |
| 45 | <chem>C(=O)(C1CC1)C1CC1</chem>                  | +       | +       | +       | 2.635  | 2.5017 | 5.0627 | 2.5299 | +       | +       | *       | 2.267  | 1.6009 | 3.0595 | 2.4146 |
| 46 | <chem>C(CCCCCCCC)CCN(C)C</chem>                 | *       | *       | +       | 7.4261 | 6.3882 | 2.2169 | 6.222  | +       | -       | +       | 6.898  | 6.0849 | 6.1649 | 6.5443 |
| 47 | <chem>C(CCCCN)CCCC</chem>                       | *       | #       | -       | 5.8137 | 5.3237 | 6.2003 | 4.7005 | +       | #       | +       | 5.513  | 4.7079 | 4.4062 | 4.7782 |
| 48 | <chem>c1(ccccc1)C(=O)C</chem>                   | *       | -       | *       | 2.4716 | 3.0497 | 5.0609 | 3.5086 | *       | #       | +       | 2.1658 | 3.12   | 2.9949 | 2.8572 |
| 49 | <chem>C1(CCCCC1)N=C=S</chem>                    | +       | +       | #       | 5.671  | 5.5592 | 3.0442 | 5.7593 | -       | +       | #       | 5.416  | 5.1829 | 5.8532 | 4.5395 |
| 50 | <chem>C(CCCCC)CCCCBr</chem>                     | *       | +       | +       | 6.1339 | 6.0378 | 5.8036 | 5.9953 | *       | -       | +       | 5.6681 | 4.9844 | 5.2506 | 5.834  |
| 51 | <chem>C(CCCC=C)CCCC(=O)O</chem>                 | *       | +       | -       | 5.3156 | 5.7089 | 5.9205 | 5.0861 | *       | +       | *       | 4.7442 | 4.924  | 4.8015 | 5.5279 |
| 52 | <chem>C(COCCCC)OCCSC#N</chem>                   | #       | *       | +       | 5.029  | 5.329  | 4.6824 | 5.1838 | #       | +       | #       | 4.229  | 4.2405 | 4.8331 | 3.9869 |
| 53 | <chem>C(O)(Cl)(Cl)Cl</chem>                     | +       | *       | *       | 2.848  | 3.6831 | 6.913  | 3.4339 | *       | *       | *       | 2.4949 | 1.5345 | 1.6778 | 3.449  |
| 54 | <chem>C(C(=O)C(Cl)(Cl)Cl)(Cl)(Cl)Cl</chem>      | +       | #       | +       | 4.77   | 5.3335 | 3.3273 | 5.1813 | *       | -       | +       | 3.4272 | 2.5489 | 3.8863 | 3.4862 |
| 55 | <chem>C(=O)(C(Cl)Cl)OC</chem>                   | +       | #       | #       | 5.114  | 4.167  | 5.7693 | 4.0892 | #       | +       | *       | 3.979  | 3.7879 | 3.635  | 3.0401 |
| 56 | <chem>c1(c(c(cc(c1)Cl)Cl)Cl)[N+](=O)[O-]</chem> | -       | -       | +       | 5.964  | 6.1029 | 3.8372 | 6.2366 | +       | +       | -       | 5.467  | 5.8341 | 6.0523 | 5.997  |

|     |                                                                     |   |   |   |        |        |        |        |   |   |   |        |        |        |        |
|-----|---------------------------------------------------------------------|---|---|---|--------|--------|--------|--------|---|---|---|--------|--------|--------|--------|
| 57  | c12c(C(=O)C(=C(C1=O)Cl)Cl)cc<br>cc2                                 | * | + | * | 6.5637 | 6.5474 | 6.216  | 5.8015 | + | + | * | 6.034  | 6.2107 | 5.8084 | 5.0275 |
| 58  | OC[C@@H]1[C@@H](O)[C@<br>@H](O)[C@@H](O1)n1nc2c(=O)<br>[nH]c(N)nc12 | + | + | * | 2.751  | 2.6404 | 7.1069 | 3.9418 | + | - | - | 2.044  | 2.6533 | 2.0677 | 2.3575 |
| 59  | c12c(ccc1NCC)cccc2                                                  | * | + | + | 4.7022 | 5.5123 | 2.6541 | 4.583  | * | # | * | 4.3703 | 4.5462 | 4.6268 | 4.6125 |
| 60  | C1(=O)C(=C(C(=O)C(=C1Cl)Cl)<br>Cl)Cl                                | - | + | # | 5.504  | 5.6835 | 4.8663 | 5.89   | * | * | + | 5.0483 | 3.8833 | 3.9555 | 4.9546 |
| 61  | c1(C(C(=O)c2ccc(cc2)OC)O)ccc(<br>cc1)OC                             | + | + | - | 4.802  | 4.8842 | 4.3521 | 5.2458 | - | + | + | 4.134  | 4.2654 | 4.4207 | 3.8311 |
| 62  | c1(c2cc(c(cc2)N)OC)cc(c(cc1)N)<br>OC                                | # | # | # | 4.869  | 5.6019 | 5.1542 | 5.5197 | + | + | - | 4.274  | 4.7893 | 5.0685 | 4.7768 |
| 63  | c1(C(=O)OCC)ccc(cc1)O                                               | + | - | + | 5.859  | 4.2689 | 4.4809 | 4.6894 | - | # | + | 5.619  | 3.8987 | 4.3344 | 4.4341 |
| 64  | N(C(C)C)(C(C)C)CCN                                                  | - | + | - | 3.045  | 4.459  | 4.6093 | 3.9837 | * | + | + | 2.5714 | 3.8041 | 3.3438 | 2.8449 |
| 65  | l(ccc(cc1)OCCOCC[N+](Cc1ccc<br>cc1)(C)C)C(CC(C)(C)C)C^-[Cl<br>-]    | # | * | * | 6.809  | 7.8903 | 3.3587 | 7.5405 | + | # | + | 6.369  | 5.3466 | 5.6365 | 6.5027 |
| 66  | c1(ccccc1)N(C)C                                                     | + | - | + | 3.578  | 4.5133 | 6.2358 | 4.2376 | # | + | # | 3.298  | 4.6235 | 3.4688 | 4.1098 |
| 67  | C(SP(=S)(OC)OC)(CC(=O)OCC)<br>C(=O)OCC                              | # | # | + | 4.59   | 4.5347 | 3.7834 | 4.5531 | # | * | * | 4.139  | 4.5165 | 4.3523 | 4.6858 |
| 68  | c1(cc(c(cc1)N)Cl)[N+](=O)[O-]                                       | - | # | * | 4.705  | 5.639  | 4.6006 | 5.0554 | * | * | + | 4.0609 | 4.8127 | 4.8716 | 4.9684 |
| 69  | c1(nc(nc(n1)Cl)NCC)NCC                                              | # | * | - | 6.305  | 6.7671 | 5.8757 | 6.718  | - | * | * | 5.681  | 5.3975 | 5.8139 | 4.0386 |
| 70  | c1(Nc2ccc(c2)cccc1                                                  | + | * | + | 5.359  | 5.3582 | 6.306  | 5.4007 | - | + | - | 4.95   | 4.8569 | 4.7154 | 4.1935 |
| 71  | c1(C(=O)C(=O)c2ccc(cc2)OC)cc<br>c(cc1)OC                            | * | + | * | 5.2783 | 5.0033 | 4.7339 | 5.6758 | * | * | - | 4.4587 | 4.0013 | 4.6278 | 3.6911 |
| 72  | C(CCCC)(CC)C=O                                                      | - | * | + | 3.78   | 3.9296 | 5.3798 | 3.866  | + | + | + | 3.541  | 3.3468 | 3.2503 | 3.7296 |
| 73  | c1(ccc(cc1)OC)C=O                                                   | # | - | * | 3.603  | 3.6709 | 3.308  | 4.0385 | - | - | + | 3.143  | 3.7731 | 3.4207 | 2.7517 |
| 74  | C(=O)(CCC)CCC                                                       | # | * | * | 2.986  | 3.7694 | 3.9833 | 3.3301 | # | + | + | 2.727  | 3.3077 | 3.2894 | 2.6059 |
| 75  | C(C)C=O                                                             | # | # | + | 3.579  | 3.1259 | 3.4222 | 3.1232 | - | * | - | 3.139  | 2.4695 | 1.9972 | 3.8712 |
| 76  | C(CCCC)C(C)N                                                        | # | - | * | 3.982  | 4.4746 | 2.8757 | 3.5007 | * | + | * | 3.4281 | 3.2567 | 3.4857 | 5.3596 |
| 77  | C(CCCCCCCCCCCCC)C[N+](<br>CC)(C)C^-[Br-]                            | - | + | * | 6.938  | 7.2432 | 4.0049 | 6.7005 | + | * | + | 6.699  | 6.3217 | 6.5922 | 4.4084 |
| 78  | C(NCCCN)CCN                                                         | # | + | - | 3.685  | 5.6053 | 6.3135 | 4.6272 | - | # | * | 3.391  | 4.1703 | 4.2352 | 5.6528 |
| 79  | C(CCCCC)CCCCN                                                       | * | + | * | 6.6887 | 6.1461 | 4.8803 | 5.7029 | + | # | - | 6.518  | 5.7013 | 5.5687 | 4.3626 |
| 80  | C(=C(Cl)Cl)(Cl)Cl                                                   | - | # | * | 4.497  | 5.214  | 5.7876 | 4.0652 | * | - | + | 4.224  | 4.0448 | 3.7643 | 5.8159 |
| 81  | c1(ccc(cc1)CSC#N)[N+](=O)[O-]                                       | + | * | + | 6.635  | 6.3954 | 3.3226 | 6.3454 | * | - | + | 6.4018 | 5.231  | 5.2726 | 7.2581 |
| 82  | c1(cc(c(cc1)Br)Cl)NC(=O)N(OC)<br>C                                  | * | # | # | 7.3537 | 7.4743 | 5.622  | 7.5363 | # | + | + | 6.824  | 6.7904 | 7.3359 | 3.2523 |
| 83  | c12c(NC(NS2(=O)=O)C(Cl)Cl)cc<br>(c(c1)S(=O)(=O)N)Cl                 | + | * | + | 3.52   | 4.0988 | 8.1615 | 3.8288 | + | + | # | 2.796  | 3.5218 | 3.7741 | 5.686  |
| 84  | c12c(Oc3c(N1)cccc3)cccc2                                            | * | + | # | 5.5469 | 5.457  | 4.218  | 5.26   | * | + | - | 5.1168 | 4.1417 | 5.0956 | 5.1205 |
| 85  | c1(c(nc(cc1)N)N)/N=N/c1cccc1<br>^Cl                                 | * | + | + | 5.9203 | 6.1132 | 5.471  | 5.1973 | - | - | * | 5.578  | 4.8647 | 5.1611 | 6.3982 |
| 86  | c1(nc(nc(n1)Cl)NC(C)C)NC(C)C                                        | * | + | - | 6.282  | 6.4405 | 5.6595 | 6.0058 | + | # | * | 5.781  | 6.213  | 5.9329 | 5.0804 |
| 87  | c1(ccc(cc1)C(=O)C)NC(=O)C                                           | * | * | + | 6.2464 | 6.238  | 6.2909 | 6.4928 | + | + | - | 5.794  | 4.5208 | 5.2753 | 7.0067 |
| 88  | c1(N(C(=O)COc2sc(nn2)C(F)F)<br>F)C(C)C)ccc(cc1)F                    | + | # | # | 9.069  | 8.9197 | 6.2155 | 8.621  | - | # | # | 7.356  | 6.9867 | 7.4023 | 5.4977 |
| 89  | C(=O)(c1ccc(cc1)N)OCCCCCCC<br>C                                     | + | - | - | 6.457  | 6.6699 | 8.6172 | 6.5488 | # | - | + | 5.958  | 5.1843 | 5.9209 | 5.8055 |
| 90  | C(CCCCC)CCCCS                                                       | - | # | * | 6.27   | 6.4579 | 6.5018 | 5.6291 | * | - | - | 5.6867 | 5.8304 | 5.5418 | 5.5118 |
| 91  | N(CCCCC)CCCCC                                                       | + | + | * | 5.43   | 5.7031 | 6.2651 | 5.2204 | # | # | + | 5.271  | 5.4899 | 5.7874 | 7.0402 |
| 92  | C(CCCCC)CCCCCN                                                      | + | + | + | 6.92   | 7.3333 | 5.9424 | 7.0315 | + | - | - | 6.815  | 7.1741 | 7.1672 | 3.7335 |
| 93  | c1(ccc(cc1)C#N)C(=O)C                                               | # | + | # | 3.499  | 4.2406 | 7.3473 | 3.8363 | * | - | * | 3.1841 | 4.2791 | 4.0439 | 2.7475 |
| 94  | c1(S(=O)(=O)Nc2ccc(en2)ccc(cc1<br>)N                                | + | + | - | 5.402  | 5.411  | 4.2279 | 5.07   | * | - | # | 3.1157 | 3.1598 | 3.2213 | 2.2196 |
| 95  | c1(C(=O)O)ccc(cc1)N                                                 | # | # | * | 2.757  | 3.2844 | 4.5471 | 3.2764 | + | + | - | 2.221  | 3.3148 | 2.8756 | 3.2437 |
| 96  | c1(ccc(cc1)N)CCCC(=O)O                                              | * | # | + | 2.9746 | 5.2637 | 3.4531 | 3.7358 | + | + | + | 2.566  | 3.2285 | 3.5288 | 6.3413 |
| 97  | c1(nc(NC(C)C)nc(n1)OC)NC(C)<br>C                                    | - | + | + | 6.143  | 5.9162 | 3.8462 | 5.7284 | + | + | * | 5.83   | 5.7079 | 4.9708 | 3.0233 |
| 98  | C(=O)(N=C=S)OCC                                                     | + | + | * | 4.626  | 5.1073 | 5.7771 | 5.5179 | # | - | + | 3.516  | 4.6217 | 4.5955 | 1.3213 |
| 99  | c12c(cc(cc2)S(=O)(=O)[O-<br>)ccc(c1)S(=O)(=O)[O-<br>]^-[Na+]^-[Na+] | + | * | + | 2.84   | 1.7959 | 4.5842 | 2.019  | - | * | # | 1.612  | 1.0902 | 0.8584 | 7.0645 |
| 100 | c1(C(=O)CCCCCCCC)cccc<br>1                                          | * | - | * | 7.8313 | 6.5786 | 2.0057 | 6.6692 | * | * | - | 7.1604 | 6.3811 | 6.5788 | 5.4658 |
| 101 | c1(NC(=O)N(OC)C)ccc(cc1)Cl                                          | # | * | - | 6.493  | 5.4759 | 7.3336 | 6.2812 | + | - | + | 5.764  | 5.6929 | 4.706  | 3.0299 |
| 102 | C(CCC)(C(=O)O)(Cl)Cl                                                | # | + | - | 3.382  | 3.873  | 6.3674 | 3.3915 | - | - | - | 2.704  | 2.7279 | 1.9167 | 5.4382 |

|     |                                                          |   |   |   |        |        |        |        |   |   |   |        |        |        |        |
|-----|----------------------------------------------------------|---|---|---|--------|--------|--------|--------|---|---|---|--------|--------|--------|--------|
| 103 | c1(/C=C/C(=O)OCC=C)cccc1                                 | + | - | * | 5.302  | 5.8365 | 3.3084 | 5.9814 | - | * | + | 5.161  | 4.9817 | 4.9765 | 5.2169 |
| 104 | n1(c2c(nc1)c(ncn2)NC)[C@@H]1O[C@@H]([C@H]([C@H]1O)O)CO   | - | + | - | 5.449  | 5.6275 | 5.4474 | 5.1467 | # | + | * | 5.107  | 3.6484 | 4.7373 | 5.126  |
| 105 | c1(cc(cc1[N+](=O)[O-])S(=O)(=O)N)[N+](=O)[O-])N(CCC)CCC  | + | + | + | 7.284  | 7.0434 | 5.5937 | 7.2978 | + | - | # | 6.021  | 5.4969 | 5.5555 | 5.7773 |
| 106 | c1(nc(nc(n1)Cl)NCC)NC(C)C                                | * | * | # | 6.6617 | 6.9772 | 6.3245 | 6.3168 | * | # | - | 6.1297 | 5.7861 | 5.8817 | 5.7102 |
| 107 | c1(c(c(cc1C#N)[N+](=O)[O-])Cl)[N+](=O)[O-]               | - | + | + | 5.826  | 6.2342 | 6.2196 | 6.2278 | + | # | + | 5.482  | 6.0941 | 5.47   | 3.766  |
| 108 | [C@@]12([n+]3cccc3)C[C@H]3C[C@@H](C1)C[C@@H](C2)C3^[Br-] | + | # | - | 4.806  | 4.455  | 6.5621 | 4.5183 | - | + | # | 3.977  | 3.3803 | 3.9966 | 4.0976 |
| 109 | c1(c(ccc1Cl)Cl)C(=O)N                                    | * | + | + | 3.8475 | 4.3776 | 4.445  | 4.5746 | * | - | - | 3.6161 | 4.6947 | 4.4696 | 6.4625 |
| 110 | C(CCCCCCCCCCCC)N                                         | - | * | - | 7.763  | 6.5111 | 5.4167 | 6.205  | - | + | + | 7.444  | 6.5504 | 6.739  | 4.9591 |
| 111 | C(CCCCC)CCCN                                             | * | # | # | 6.6725 | 5.5524 | 7.2872 | 5.0386 | - | - | - | 6.279  | 4.9649 | 4.7694 | 6.2184 |
| 112 | c1(Oe2ccc(cc2)Br)ccc(cc1)Br                              | + | - | + | 6.34   | 6.91   | 5.0078 | 6.6148 | - | + | + | 6.136  | 5.8248 | 5.9022 | 5.8907 |
| 113 | c12c(c(cc1O)Cl)Cl)cccc2                                  | + | + | + | 6.705  | 5.9    | 6.4333 | 5.749  | * | - | + | 6.1824 | 5.8559 | 5.5531 | 6.4577 |
| 114 | c1(c(=O)n(c(m1)SC)N)C(C)(C)C                             | - | - | - | 7.331  | 6.8757 | 5.7316 | 6.0708 | + | + | + | 6.787  | 6.1947 | 6.025  | 4.4169 |
| 115 | S(SCC=C)CC=C                                             | - | - | + | 4.625  | 5.1518 | 6.628  | 5.29   | - | # | # | 4.36   | 4.3725 | 4.4985 | 6.25   |
| 116 | c1(cc(cc1Cl)Cl)Cl)N=C=S                                  | # | + | - | 6.632  | 6.8669 | 4.5333 | 6.7081 | * | # | * | 6.3131 | 7.5414 | 6.872  | 3.8846 |
| 117 | N(=C=S)C(C)C                                             | - | * | * | 5.552  | 5.4679 | 7.7057 | 4.7494 | + | # | * | 5.138  | 5.2244 | 4.3454 | 6.7879 |
| 118 | c1(nc(nc(n1)SC)NCC)NC(C)(C)C                             | + | + | + | 7.849  | 7.7773 | 5.4339 | 8.4381 | - | + | * | 7.519  | 7.0036 | 7.5803 | 8.2702 |
| 119 | c1(N(COCCCC)C(=O)C)Cl)ccc1CC)CC                          | + | + | - | 8.523  | 8.6758 | 7.79   | 8.1328 | * | + | * | 7.7501 | 7.7757 | 8.2776 | 5.1414 |
| 120 | [N+](Cc1cccc1)(CCCC)(CCCC)CCCC^[Cl-]                     | # | * | - | 5.938  | 4.9094 | 9.0827 | 5.0692 | * | * | + | 4.8606 | 4.7718 | 4.4754 | 4.141  |
| 121 | C(=O)(OCCN(C)C)C=C                                       | + | # | + | 5.709  | 4.3717 | 5.5159 | 4.5906 | - | + | - | 4.952  | 3.4738 | 3.9704 | 2.9996 |
| 122 | C(=O)/N=N/C(=O)OC(C)C)OC(C)C                             | # | - | - | 3.607  | 4.0463 | 4.2513 | 3.9866 | + | + | + | 2.971  | 3.8025 | 3.266  | 4.9621 |
| 123 | c1(c(c(C(C)C)ccc1)N)C(C)C                                | # | - | - | 4.929  | 5.826  | 4.0547 | 5.197  | - | - | - | 3.987  | 4.8724 | 5.0619 | 4.8376 |
| 124 | c1(ccc(cc1)CCCCCCCCCCC)S(=O)(=O)[O-]^-[Na+]              | + | * | * | 4.501  | 5.7465 | 6.5609 | 5.7345 | + | + | + | 3.919  | 4.9632 | 5.5567 | 3.8246 |
| 125 | c1(CCC(=O)C)cccc1                                        | - | # | + | 3.809  | 4.3391 | 5.9376 | 3.8169 | * | + | * | 3.6146 | 3.6092 | 3.6631 | 6.8592 |
| 126 | C(CCCCCCN)CCCCCCC                                        | + | * | * | 7.609  | 7.1046 | 3.6771 | 6.6935 | + | + | + | 7.412  | 6.9171 | 6.8039 | 2.8446 |
| 127 | C(C(=O)O)CCBr                                            | - | # | - | 2.953  | 3.7251 | 7.4003 | 3.4211 | - | # | * | 2.602  | 2.6346 | 2.0501 | 5.6668 |
| 128 | N(CCN=C=S)(CC)CC                                         | + | + | + | 5.668  | 6.3644 | 3.3382 | 6.3786 | * | - | + | 5.5642 | 6.292  | 5.6974 | 4.4435 |
| 129 | C(/C=C/c1cccc1)Cl                                        | + | # | # | 4.466  | 4.9654 | 5.7042 | 4.0545 | * | # | # | 3.9653 | 4.5748 | 3.9573 | 5.1686 |
| 130 | c1(Oe2cccc2)c(ccc1)N                                     | + | + | # | 4.724  | 5.6213 | 4.87   | 5.6057 | * | + | * | 4.3539 | 4.1767 | 4.684  | 3.968  |
| 131 | Cl(CC(CC(Cl)N)(C)C)(CN)C                                 | * | - | - | 5.1898 | 5.1734 | 4.7387 | 4.0725 | * | # | * | 4.9759 | 2.7312 | 2.8343 | 1.8262 |
| 132 | C(=O)([C@@H](C)Cl)O                                      | * | - | * | 2.6394 | 3.0412 | 3.858  | 3.5455 | # | - | + | 1.482  | 2.4213 | 2.8554 | 6.1655 |
| 133 | C(CCCCCCN)CCCCC                                          | - | - | * | 6.855  | 6.5109 | 2.943  | 6.0292 | + | - | - | 6.568  | 6.1807 | 6.0047 | 2.7872 |
| 134 | c1ncnc1                                                  | - | # | # | 2.913  | 3.2303 | 6.6205 | 1.471  | - | - | + | 2.531  | 2.352  | 2.9649 | 5.0161 |
| 135 | C(=O)(OCC=C)CCl                                          | + | - | * | 6.025  | 5.1707 | 2.5204 | 5.5319 | + | + | + | 5.597  | 4.2391 | 4.5528 | 2.5732 |
| 136 | [N+](CC1CO1)(C)(C)C^[Cl-]                                | - | + | * | 3.08   | 2.4795 | 5.1559 | 2.601  | * | * | # | 2.928  | 2.0145 | 1.3787 | 2.4615 |
| 137 | [C@@H](Cc1c[nH]cn1)(NC(=O)CCN)C(=O)O                     | - | # | + | 3.836  | 3.8464 | 2.4339 | 3.6223 | + | - | - | 3.622  | 2.9317 | 3.1843 | 5.5841 |
| 138 | c1(NC(=O)N(OC)C)ccc(cc1)Br                               | + | + | - | 6.209  | 5.8907 | 3.2351 | 6.2881 | - | * | # | 5.621  | 5.2956 | 4.8549 | 3.8003 |
| 139 | [N+](CCCC)(CCCC)(CCCC)CC                                 | + | * | # | 5.289  | 5.7049 | 6.591  | 4.5965 | # | * | - | 5.011  | 4.9732 | 5.9162 | 3.6826 |
| 140 | c1(ccc(o1)C)C(CC=O)C                                     | * | * | + | 4.0684 | 3.9183 | 7.0622 | 3.9309 | # | * | + | 3.881  | 3.133  | 3.0347 | 4.1732 |
| 141 | Cl(CCCCC)CN                                              | + | - | * | 4.441  | 3.6212 | 3.6031 | 4.487  | - | - | - | 3.94   | 3.3869 | 4.2337 | 3.8211 |
| 142 | C(Oc1ccc(cc1)C(=O)O)(F)(F)F                              | + | + | * | 3.952  | 3.7154 | 4.466  | 4.4683 | + | + | - | 3.469  | 3.7517 | 4.2925 | 4.6067 |
| 143 | c1(ccc(cc1)N)CCCCC                                       | # | - | # | 5.579  | 5.92   | 3.6062 | 4.8601 | - | * | * | 5.416  | 4.5469 | 4.9307 | 5.8558 |
| 144 | N(C(=O)CCCCCCCCC)(CC)CC                                  | - | # | + | 6.453  | 6.2656 | 5.4149 | 6.2124 | - | - | # | 6.321  | 5.3012 | 5.5717 | 4.9456 |
| 145 | c1(c(cc(cc1)OC)OC)N=C=S                                  | * | * | + | 6.1145 | 5.0058 | 6.096  | 5.6389 | # | + | - | 5.711  | 5.9436 | 5.7936 | 3.4122 |
| 146 | Cl(=CCCC)CCN                                             | + | * | * | 3.721  | 4.3127 | 5.3534 | 3.7684 | * | * | - | 3.3373 | 3.3765 | 5.1123 | 5.1535 |
| 147 | c1(ccc(cc1)C(C)C)NC(=O)N(C)C                             | * | + | - | 6.8673 | 5.697  | 3.7906 | 5.529  | # | + | * | 6.273  | 4.9478 | 5.3253 | 6.9095 |
| 148 | c1(N(C(=O)C)CO)C(C)C)ccc1C)CC                            | # | # | + | 9.033  | 7.3529 | 5.2064 | 7.3998 | + | - | + | 7.477  | 6.7128 | 6.5089 | 1.2522 |
| 149 | S(=O)(=O)(c1c(cc(cc1)C)C)O                               | + | + | - | 2.089  | 2.1751 | 9.2576 | 2.6119 | # | * | + | 1.784  | 2.3126 | 2.413  | 5.1004 |
| 150 | c1(c(c(cc1Cl)Cl)Cl)Cl)N                                  | + | * | - | 5.601  | 5.2268 | 1.991  | 4.9801 | - | + | * | 5.317  | 4.9205 | 4.8113 | 5.8199 |
| 151 | c1(c(nc(n1)Cl)Br)Cl                                      | - | + | + | 5.96   | 5.7496 | 4.9866 | 5.774  | + | + | + | 5.801  | 5.6197 | 5.0814 | 4.5043 |
| 152 | c1(cc(sc1Cl)Cl)C(=O)C                                    | * | - | * | 4.6566 | 4.166  | 4.4752 | 4.4545 | * | + | - | 4.464  | 3.8255 | 4.4018 | 2.0485 |
| 153 | C(CCN(=O)N)[C@@H](C(=O)                                  | - | - | - | 2.567  | 3.6761 | 4.3336 | 3.0781 | - | - | * | 1.403  | 2.172  | 1.8659 | 2.9038 |

|     |                                                      |   |   |   |        |        |        |        |   |   |   |        |        |        |        |
|-----|------------------------------------------------------|---|---|---|--------|--------|--------|--------|---|---|---|--------|--------|--------|--------|
|     | O)N                                                  |   |   |   |        |        |        |        |   |   |   |        |        |        |        |
| 154 | C(C(CO)(F)F)(C(F)(F)F)F                              | + | - | # | 3.034  | 3.1058 | 2.4981 | 4.1061 | + | + | + | 2.713  | 2.4213 | 2.6744 | 2.981  |
| 155 | C(C(C(=O)O)(F)F)(C(F)(F)F)(F)F                       | - | # | # | 3.54   | 3.9674 | 4.0188 | 4.6355 | + | # | * | 2.068  | 2.7819 | 3.4573 | 4.9536 |
| 156 | c1(ccc(cc1)N)CCCCCCC                                 | + | + | * | 6.009  | 6.2168 | 3.8092 | 5.1922 | * | - | * | 5.7365 | 4.9151 | 5.3303 | 5.9941 |
| 157 | c1(ccc(cc1)N)CCCCCCCCC                               | * | * | * | 7.1209 | 7.1073 | 5.8048 | 6.1887 | - | * | + | 6.598  | 6.0197 | 6.5292 | 5.5964 |
| 158 | C(c1ccc(cc1)O)c1ccc(cc1)O(F)(F)F                     | * | + | + | 5.3614 | 5.8519 | 6.9746 | 5.9743 | * | # | * | 5.1651 | 5.4229 | 5.3082 | 4.9319 |
| 159 | c1(ccc(cc1)N)OCCCCC                                  | - | # | - | 5.576  | 5.9269 | 5.6198 | 5.2464 | # | - | + | 4.934  | 4.5627 | 5.0776 | 5.9422 |
| 160 | c1(c(c(c(c1[N+](=O)[O-])C)C)C)[N+](=O)[O-]NC(CC)CC   | * | # | - | 7.3021 | 6.106  | 5.5565 | 7.0816 | * | # | + | 6.3851 | 5.7887 | 6.0166 | 2.5325 |
| 161 | C(=O)(C(C)Cl)C                                       | + | - | + | 5.119  | 3.4114 | 6.7905 | 4.214  | - | + | * | 4.772  | 3.35   | 3.6216 | 7.5529 |
| 162 | C(CCCCCC)CCCCCCCC                                    | * | - | # | 6.7172 | 7.6982 | 4.1901 | 7.3578 | + | - | * | 6.608  | 7.6535 | 7.6032 | 3.7459 |
| 163 | C(C(=O)O)CCBr                                        | # | + | # | 4.583  | 4.4013 | 8.1802 | 3.918  | * | # | - | 3.5193 | 2.8649 | 2.3771 | 2.9324 |
| 164 | C(C(F)(F)F)(C(=O)O)(F)F                              | + | - | + | 5.069  | 3.7046 | 3.7551 | 3.8878 | + | + | + | 3.784  | 2.6992 | 3.4015 | 7.8052 |
| 165 | c1(c(ccc(c1)O)c1c(cc(cc1)Cl)Cl)[N+](=O)[O-]C(=O)OC   | + | - | + | 9.225  | 7.8427 | 3.802  | 8.519  | - | - | * | 9.113  | 8.1608 | 7.4345 | 3.8041 |
| 166 | P(=O)(O)c1ccc(cc1)[N+](=O)[O-]([O-])[O-]^-[Na+][Na+] | + | + | # | 3.852  | 3.5212 | 7.8797 | 3.6742 | + | * | * | 2.238  | 2.1417 | 2.3461 | 5.5512 |
| 167 | [N+](CCCC)(CCCC)(CCCC)CCCC^-[Cl-]                    | + | - | + | 5.842  | 5.9517 | 3.9033 | 5.0742 | - | * | + | 4.427  | 4.3478 | 6.3997 | 4.0623 |
| 168 | c1(c(nenc1)Cl)Cl[N+](=O)[O-]                         | + | + | + | 4.796  | 5.1653 | 5.1953 | 4.6173 | + | + | # | 4.443  | 4.4827 | 4.6409 | 3.1533 |
| 169 | c1(c(c(c(c1F)F)F)F)C(F)(F)F                          | + | * | - | 4.356  | 4.9153 | 5.5145 | 4.6933 | + | # | + | 3.921  | 4.2819 | 3.2574 | 4.0288 |
| 170 | c1(cccc1)/C=C/Br                                     | * | - | * | 4.156  | 4.7912 | 4.0011 | 4.0604 | # | # | * | 4.018  | 3.975  | 3.8684 | 4.5226 |
| 171 | c1(cccc1)CCS                                         | * | - | + | 5.5174 | 5.4477 | 4.2932 | 5.0205 | + | + | + | 5.099  | 5.1008 | 4.6229 | 4.3868 |
| 172 | c12c([nH]cn2)ncn1NC                                  | # | # | - | 3.998  | 4.1086 | 5.0626 | 4.2685 | * | # | # | 3.5109 | 4.3407 | 3.7959 | 3.2435 |
| 173 | C1(CCCC(=O)O)CCCCC1                                  | + | * | + | 4.173  | 4.2242 | 4.6626 | 4.0148 | * | # | * | 3.5307 | 2.5425 | 4.2047 | 6.5468 |
| 174 | N(CCCCCC)CCCCCCC                                     | * | + | * | 6.7946 | 6.6687 | 3.773  | 6.7343 | + | * | # | 6.504  | 6.9685 | 6.4065 | 5.3447 |
| 175 | c1(C(=O)C(c2ccc(c2)Cl)cccc1                          | + | * | # | 5.284  | 5.5641 | 7.3661 | 5.4213 | * | * | # | 4.6555 | 5.1113 | 4.5409 | 2.949  |
| 176 | c1(c(ccc(c1)O)O)CC(=O)O                              | + | - | * | 4.253  | 4.0001 | 5.1618 | 3.6423 | - | # | * | 4.05   | 2.937  | 2.991  | 5.0444 |
| 177 | C(CCCBr)CCBr                                         | + | * | + | 5.861  | 5.5303 | 3.3559 | 5.6144 | # | # | # | 4.868  | 4.0967 | 4.842  | 3.3208 |
| 178 | N(CCC)CCN=O                                          | - | + | - | 4.001  | 4.1631 | 4.8892 | 3.9719 | * | * | - | 3.3986 | 3.5799 | 3.6569 | 4.5889 |
| 179 | C(C=C/CN(C)C)N(C)C                                   | # | - | * | 5.112  | 4.3015 | 3.3135 | 4.0208 | # | * | * | 4.51   | 4.4239 | 4.0697 | 2.7679 |
| 180 | c1(C(=O)O)ccc(cc1)F                                  | - | - | - | 3.785  | 4.098  | 4.9164 | 3.7631 | + | # | + | 3.227  | 4.3038 | 3.6368 | 4.8988 |
| 181 | C(C(=O)CCCC)CCCC                                     | - | - | # | 5.646  | 5.3725 | 3.9149 | 5.2608 | # | * | # | 5.241  | 4.9248 | 5.0833 | 3.6024 |
| 182 | C(CCN)CCN                                            | - | + | + | 3.231  | 4.6633 | 5.7878 | 3.7967 | * | * | + | 2.6729 | 3.4184 | 3.0588 | 5.4894 |
| 183 | c1([N+](=N/c2ccc(c2)[O-])cccc1                       | # | * | + | 5.411  | 4.8585 | 3.6552 | 5.5261 | - | + | - | 5.17   | 4.6741 | 4.8391 | 5.4301 |
| 184 | [C@H]12C(C[C@H](C1)C=C2)C(=O)C                       | * | + | - | 3.3777 | 4.4819 | 5.2014 | 5.2392 | * | - | + | 5.4283 | 6.7071 | 5.7042 | 8.5133 |
| 185 | c12c3c4ccc1c1c(cc2ccc3ccc4)ccc1                      | + | - | + | 8.424  | 8.9428 | 6.6587 | 8.7289 | - | + | # | 8.165  | 7.973  | 8.6666 | 2.7745 |
| 186 | C1CSCSC1                                             | + | + | + | 3.051  | 3.6466 | 8.7178 | 2.7441 | + | + | # | 2.398  | 2.619  | 3.0369 | 3.0911 |
| 187 | C(n1ncn1)(O)c1ccc(cc1)Cl)C(=O)C(C)C                  | - | * | * | 5.126  | 6.1367 | 3.841  | 3.9419 | - | + | * | 3.117  | 2.9677 | 3.4263 | 1.6074 |
| 188 | C1(=O)C(=O)NC(=O)NC1=O^O^O^O                         | # | - | - | 2.253  | 2.4228 | 3.2811 | 2.3051 | * | - | - | 1.8669 | 2.9129 | 1.5587 | 3.677  |
| 189 | c1(c(ccc1)OC(=O)C)C(=O)O                             | - | # | # | 3.779  | 3.8812 | 3.1437 | 4.0063 | + | # | # | 2.874  | 3.4716 | 3.4598 | 6.9848 |
| 190 | c1(N(C(COC)C)C(=O)C)Cl)c(ccc1)CC                     | * | * | - | 7.3069 | 7.6138 | 3.4557 | 7.5913 | - | * | * | 6.131  | 7.023  | 7.0219 | 7.9064 |
| 191 | c1(N(CCOCC)C(=O)C)Cl)c(ccc1)CC                       | + | * | - | 8.667  | 8.8357 | 9.3995 | 8.5678 | + | # | - | 7.684  | 7.272  | 8.3667 | 6.4447 |
| 192 | n1(C2CCCC2)c(=O)n(c(nc1=O)N(C)C                      | + | * | # | 7.288  | 6.9614 | 9.0003 | 7.0901 | + | # | + | 6.883  | 6.4494 | 5.7051 | 7.2291 |
| 193 | [N+](CCCCC)(CCCCC)CCCCC^-[Cl-]                       | - | # | + | 7.147  | 7.8512 | 7.1471 | 7.4301 | + | # | + | 6.764  | 8.6833 | 8.4426 | 3.7526 |
| 194 | C(C(C)S)(C(=O)O)N                                    | * | * | - | 4.4836 | 3.4372 | 9.0712 | 4.8484 | + | # | * | 3.794  | 3.0848 | 4.192  | 1.9705 |
| 195 | c12c(ccc(c1)S(=O)(=O)[O-])cccc2^-[Na+]               | + | + | - | 2.153  | 2.5888 | 4.3744 | 3.0671 | # | + | + | 1.476  | 1.7286 | 1.6675 | 4.9021 |
| 196 | c1(cc(cc1O)C)[N+](=O)[O-][N+](=O)[O-]                | + | + | # | 5.498  | 5.0584 | 2.465  | 5.7917 | + | * | * | 5.183  | 4.2295 | 3.6122 | 4.6187 |
| 197 | c1(NNC(=O)N=N/c2ccc(c2)cccc1                         | * | * | * | 6.2668 | 6.1309 | 4.951  | 5.6886 | + | + | * | 5.79   | 5.3479 | 5.2417 | 4.3811 |
| 198 | c12c3c(Cc1cc(cc2)NC(=O)C)cccc3                       | - | - | + | 5.307  | 5.64   | 5.6117 | 5.6192 | + | * | + | 4.917  | 5.3918 | 4.6472 | 3.5272 |
| 199 | C1(C(=O)c2ccc(c2)CCC1                                | * | - | - | 4.6131 | 4.1607 | 5.2113 | 3.6974 | * | + | + | 4.1627 | 2.5746 | 3.6692 | 3.3929 |
| 200 | C([N+](C)C)CCCCCCCC[N                                | * | + | + | 4.3662 | 4.4131 | 3.4994 | 4.601  | * | * | + | 2.8725 | 4.6475 | 3.9747 | 4.1283 |

|     |                                                                         |   |   |   |        |        |        |        |   |   |   |        |        |        |        |  |  |  |  |
|-----|-------------------------------------------------------------------------|---|---|---|--------|--------|--------|--------|---|---|---|--------|--------|--------|--------|--|--|--|--|
|     | +](C)(C)C^[Br-]^[Br-]                                                   |   |   |   |        |        |        |        |   |   |   |        |        |        |        |  |  |  |  |
| 201 | C(CCCC(C)N)(C)C                                                         | - | - | * | 4.203  | 4.5916 | 4.4149 | 3.5278 | # | # | + | 3.769  | 3.3718 | 3.5715 | 4.0565 |  |  |  |  |
| 202 | S(CCCC)CCCC                                                             | # | * | * | 4.849  | 4.4837 | 4.0123 | 3.9172 | * | + | - | 4.3031 | 3.89   | 4.0945 | 6.5352 |  |  |  |  |
| 203 | c12c(cccc1N=C=S)cccc2                                                   | - | # | * | 7.329  | 7.1211 | 4.9937 | 6.042  | # | * | + | 6.99   | 6.8201 | 6.1819 | 5.0182 |  |  |  |  |
| 204 | c1(c(cc(c(n1)Cl)Cl)Cl)OCC(=O)O                                          | - | + | - | 3.577  | 5.9434 | 7.1803 | 4.8963 | - | + | + | 3.106  | 4.0806 | 4.5247 | 7.9554 |  |  |  |  |
| 205 | c1(NC(=N)NC(=N)NCCCCCN C(=N)NC(=N)Nc2ccc(cc2)Cl)ccc(cc1)Cl              | + | + | - | 7.24   | 7.2657 | 4.3302 | 7.0877 | + | + | # | 7.046  | 6.9085 | 7.7432 | 4.2388 |  |  |  |  |
| 206 | C(=C)Cl                                                                 | - | + | # | 5.785  | 5.4597 | 7.3903 | 4.9499 | + | - | # | 5.432  | 5.3804 | 3.8568 | 2.7402 |  |  |  |  |
| 207 | C(OCC)C=C                                                               | # | - | + | 4.36   | 3.3596 | 5.0161 | 3.2532 | # | + | * | 4.111  | 3.2979 | 2.5487 | 4.0168 |  |  |  |  |
| 208 | c1(ccc(cc1)OC)CCN                                                       | - | * | + | 3.648  | 4.6412 | 2.8317 | 4.3666 | + | + | * | 3.394  | 4.0204 | 3.842  | 2.0055 |  |  |  |  |
| 209 | C([N+](C)(C)C)CCCC[N+](C)(C)C^[Br-]^[Br-]                               | - | + | * | 2.828  | 3.2258 | 3.8938 | 3.2724 | + | - | - | 2.455  | 3.1579 | 2.3762 | 2.2911 |  |  |  |  |
| 210 | c1(cc(nc(n1)N)O)N                                                       | * | # | * | 2.6521 | 4.6389 | 2.8552 | 2.8633 | + | + | * | 2.388  | 1.5837 | 2.1146 | 1.8056 |  |  |  |  |
| 211 | C(=O)(CCCN)O                                                            | + | + | - | 3.445  | 3.5002 | 2.8796 | 3.2039 | * | # | * | 2.8065 | 2.22   | 2.2262 | 2.7633 |  |  |  |  |
| 212 | [N+](Cc1cccc1)(CC)(CC)CC^[Cl-]                                          | * | * | + | 2.869  | 3.9044 | 3.0737 | 3.7727 | + | + | # | 2.035  | 2.739  | 1.7333 | 5.7749 |  |  |  |  |
| 213 | C(=C(c1ccc(cc1)O)/CC)/(c1ccc(cc1)O)CC                                   | - | - | - | 5.81   | 6.4346 | 2.4637 | 5.9718 | - | + | + | 5.048  | 4.9306 | 4.8484 | 5.8796 |  |  |  |  |
| 214 | c12c3c(ccc1cc1c(c2)cccc1)cccc3                                          | + | * | + | 7.86   | 7.4775 | 6.8869 | 8.0202 | - | # | - | 5.896  | 5.7103 | 6.4861 | 5.3858 |  |  |  |  |
| 215 | c1([C@H])([C@H](NC(=O)C(Cl)Cl)O)ccc(cc1)[N+](=O)[O-]                    | * | + | + | 6.2306 | 7.1073 | 7.5969 | 6.3865 | + | - | + | 4.897  | 5.2141 | 5.0732 | 6.3777 |  |  |  |  |
| 216 | n1(c(nmc(c1=O)CC(C)C)SC)/N=C/C(C)C                                      | + | # | # | 6.516  | 6.1752 | 6.3277 | 6.5186 | + | - | * | 6.027  | 6.2649 | 5.9465 | 4.9646 |  |  |  |  |
| 217 | C(N=C=S)C=C                                                             | * | + | * | 6.0825 | 5.4525 | 6.1515 | 5.267  | + | + | + | 5.85   | 5.5633 | 5.041  | 3.3541 |  |  |  |  |
| 218 | O=c1n(C)e2c(n(C)cn2)c(=O)n1C                                            | + | * | + | 3.306  | 3.7639 | 5.3127 | 3.4784 | - | # | - | 2.745  | 2.2785 | 2.1786 | 2.8293 |  |  |  |  |
| 219 | c1(c(nc(n1)O)C)N^Cl                                                     | - | + | - | 2.121  | 3.6228 | 3.9819 | 2.795  | + | - | # | 1.623  | 2.3539 | 2.8704 | 4.5226 |  |  |  |  |
| 220 | c1(cc(cc1)O)[N+](=O)[O-]][N+](=O)[O-]                                   | * | - | + | 5.4589 | 5.422  | 3.0998 | 4.9053 | # | * | + | 5.297  | 3.7297 | 3.2948 | 3.3596 |  |  |  |  |
| 221 | n1(c2c(nc1)c(ncn2)N)[C@@H]1O[C@@H]([C@H]([C@H]1O)O)COP(=O)(OP(=O)(O)O)O | * | - | + | 4.9585 | 4.4523 | 4.8131 | 4.6813 | # | * | - | 3.696  | 3.9901 | 2.8951 | 3.2449 |  |  |  |  |
| 222 | c12c(c(cc(n1)C(=O)O)O)cccc2O                                            | + | + | * | 4.455  | 4.1395 | 4.7484 | 3.4322 | - | * | - | 3.932  | 3.7351 | 4.4111 | 2.1237 |  |  |  |  |
| 223 | c1(cenen1)N                                                             | + | + | + | 2.352  | 3.1482 | 4.4288 | 2.2951 | - | - | + | 1.961  | 2.2261 | 1.9127 | 2.4523 |  |  |  |  |
| 224 | C(C(=O)C)CCC                                                            | * | # | + | 2.6169 | 3.3631 | 2.4367 | 2.8957 | # | - | - | 2.215  | 2.7355 | 2.6754 | 5.1082 |  |  |  |  |
| 225 | C(CCC)N=C=S                                                             | + | - | # | 5.719  | 5.3473 | 2.9298 | 5.1101 | + | + | + | 5.505  | 5.6508 | 5.1973 | 3.7818 |  |  |  |  |
| 226 | c12c(ccc(=O)[nH]1)cccc2                                                 | * | * | * | 3.406  | 4.3802 | 5.3838 | 3.486  | + | + | + | 2.571  | 3.0192 | 3.3613 | 3.6697 |  |  |  |  |
| 227 | c12c(ccc(c1)C(=O)O)N)cccc2                                              | + | - | * | 4.403  | 4.3013 | 3.514  | 4.6162 | - | * | * | 3.825  | 3.178  | 3.6809 | 2.3811 |  |  |  |  |
| 228 | N1(CCOCC1)N=O                                                           | * | * | + | 4.1254 | 3.0172 | 4.7473 | 3.8647 | - | * | * | 3.141  | 2.3929 | 3.4281 | 5.2678 |  |  |  |  |
| 229 | C(COC(=O)CCC)(COC(=O)CCC)OC(=O)CCC                                      | - | + | # | 3.962  | 5.3773 | 3.9216 | 4.6105 | + | + | - | 3.431  | 3.9533 | 2.3779 | 2.5645 |  |  |  |  |
| 230 | C(CC(=O)O)CCCN                                                          | * | * | + | 2.3492 | 3.8229 | 4.4923 | 3.2059 | - | * | + | 1.17   | 2.6038 | 4.2008 | 3.489  |  |  |  |  |
| 231 | c12c(ccc([n+][CC]C)cccc2^[I-]                                           | # | * | - | 3.455  | 3.4426 | 2.7808 | 3.1066 | + | * | # | 3.158  | 3.5869 | 2.7788 | 4.86   |  |  |  |  |
| 232 | N(c1cccc1)(c1cccc1)C=O                                                  | + | # | * | 4.016  | 4.7578 | 4.0963 | 4.9646 | * | - | - | 3.7765 | 4.7753 | 4.6878 | 4.412  |  |  |  |  |
| 233 | c1(C(=O)CCc2ccc(cc2)O)c(cc(cc1)O)O                                      | # | + | + | 4.058  | 5.4146 | 4.3546 | 4.5128 | + | + | + | 3.907  | 4.2397 | 1.6996 | 1.6469 |  |  |  |  |
| 234 | S(=O)(=O)(c1c(ccc(c1)C)C)O                                              | * | - | * | 1.5557 | 1.8818 | 4.3077 | 2.7477 | + | + | - | 1.04   | 2.471  | 3.7024 | 4.1388 |  |  |  |  |
| 235 | c1(N(N=O)C)cccc1                                                        | * | + | * | 3.9036 | 3.6572 | 1.8489 | 4.4437 | # | * | + | 3.532  | 4.2877 | 3.9581 | 3.4502 |  |  |  |  |
| 236 | c1(ccc(cc1)CCCCCCC)S(=O)(=O)[O-]^[Na+]                                  | - | + | - | 3.813  | 4.5593 | 3.9734 | 4.4058 | + | # | + | 3.433  | 3.4905 | 3.4995 | 4.4648 |  |  |  |  |
| 237 | c12c(nc(o1)N)cc(cc2)Cl                                                  | - | * | * | 4.324  | 4.5014 | 4.378  | 3.5943 | - | - | + | 3.865  | 3.2912 | 3.5548 | 3.1666 |  |  |  |  |
| 238 | c1(ccc(cc1)N)C(=O)OC                                                    | + | * | * | 3.661  | 4.0928 | 3.7346 | 4.0388 | + | * | - | 3.235  | 3.751  | 3.7676 | 4.5824 |  |  |  |  |
| 239 | c1(C(=O)N)ccc(cc1)[N+](=O)[O-]                                          | + | * | * | 5.208  | 4.8962 | 3.8387 | 5.4587 | # | + | - | 5.003  | 3.9852 | 4.5062 | 4.5009 |  |  |  |  |
| 240 | C1(=N/c2ccc(cc2)[O-])C=C(C(=O)C(=C1)Cl)Cl^[Na+]                         | + | # | + | 4.781  | 4.9622 | 4.4894 | 4.6258 | + | - | - | 4.14   | 4.3876 | 4.6998 | 4.3488 |  |  |  |  |
| 241 | c1(cc(c(cc1)O)O)C(=O)CNC^Cl                                             | # | + | - | 5.192  | 4.0968 | 4.7711 | 4.3618 | * | - | * | 4.8326 | 4.5693 | 5.3696 | 5.4579 |  |  |  |  |
| 242 | N(CCCCC)(CCCC)CCCC                                                      | * | + | - | 5.9551 | 6.0798 | 4.911  | 5.487  | - | + | # | 4.738  | 4.8339 | 3.6184 | 3.6373 |  |  |  |  |
| 243 | c1(C(=O)O)ccc(cc1)[N+](=O)[O-]                                          | * | + | * | 4.0769 | 4.0676 | 6.6372 | 4.5351 | + | * | + | 3.761  | 3.8703 | 4.069  | 3.6984 |  |  |  |  |
| 244 | c1(ccc(cc1)OCC)NC(=O)C                                                  | + | - | * | 3.641  | 4.7723 | 3.9142 | 3.9085 | - | # | + | 3.052  | 3.4688 | 3.0704 | 3.0932 |  |  |  |  |
| 245 | c1(ccccc1)N                                                             | # | * | * | 3.714  | 3.8831 | 4.0354 | 3.4444 | * | - | - | 3.124  | 4.0258 | 2.5705 | 2.2403 |  |  |  |  |
| 246 | [n+](cccc1)CC(=O)O^[Cl-]                                                | - | # | + | 2.422  | 3.2584 | 3.3549 | 2.3767 | + | - | * | 2.122  | 3.0576 | 1.8984 | 1.977  |  |  |  |  |
| 247 | C(C(=O)O)CCCl                                                           | + | * | * | 2.297  | 2.6144 | 2.934  | 2.8599 | # | + | + | 1.831  | 2.5078 | 4.2045 | 4.6538 |  |  |  |  |
| 248 | C(CCCBr)CCBr                                                            | * | # | + | 5.2932 | 5.0589 | 2.3053 | 5.63   | - | - | + | 4.571  | 3.5743 | 4.7989 | 4.9687 |  |  |  |  |

|     |                                                                                              |   |   |   |        |        |        |        |   |   |   |        |        |         |        |
|-----|----------------------------------------------------------------------------------------------|---|---|---|--------|--------|--------|--------|---|---|---|--------|--------|---------|--------|
| 249 | c1(c(c(ccc1N)Cl)Cl)Cl                                                                        | + | + | # | 5.316  | 4.7633 | 4.682  | 4.1911 | + | + | - | 4.932  | 4.8215 | 4.2947  | 4.4451 |
| 250 | c1(c(cc(cc1Cl)N)Cl)Cl                                                                        | + | * | + | 5.179  | 5.3269 | 4.7964 | 4.9042 | - | - | * | 4.737  | 4.4273 | 2.9804  | 2.8923 |
| 251 | c1(ccccc1)NC(=O)N                                                                            | # | + | # | 3.501  | 4.1306 | 4.7019 | 3.6627 | * | - | + | 2.9667 | 3.1397 | 3.202   | 4.3882 |
| 252 | C(=O)ClO                                                                                     | + | + | + | 5.228  | 5.3478 | 3.4281 | 6.0433 | - | + | - | 4.57   | 3.8725 | -0.7006 | 6.3928 |
| 253 | [C@@H]12[C@](C(=C3C(C2)[C@](c2c(C3=O)c(ccc2Cl)O)(C)O)O)(C(=O)C=C([C@H]1N(C)C)O)C(=O)N)O^Cl   | * | + | + | 7.1226 | 6.0079 | 4.95   | 7.2394 | + | * | + | 6.613  | 6.7862 | 6.1096  | 0.2747 |
| 254 | [C@H]12[C@](C(=C3[C@H](C1)[C@](c1c(C3=O)c(ccc1)O)(C)O)O)(C(=O)C=C([C@H]2N(C)C)O)C(=O)N)O^Cl~ | + | + | # | 7.104  | 6.979  | 6.6448 | 0.2508 | + | + | + | 6.0986 | 0.0414 | 6.063   | 5.9858 |
| 255 | c1(S(=O)(=O)NC(=O)Nc2nc(nc(n2)C)OC)c(cccc1)Cl                                                | + | - | # | 7.106  | 7.3418 | 0.4685 | 7.6206 | # | * | - | 6.091  | 6.0543 | 2.6167  | 3.264  |
| 256 | c1(c(nc(c1O)C)CO)C=O^Cl                                                                      | * | # | * | 3.8175 | 3.5538 | 7.7604 | 5.0737 | + | + | # | 3.446  | 3.7033 | 3.1837  | 2.7221 |
| 257 | n1(c2c(nc1)c(ncn2)N)[C@@H]1O[C@@H]([C@H](C1)O)COP(=O)(O)O                                    | - | + | * | 3.586  | 3.9634 | 3.482  | 3.8739 | # | * | * | 3.135  | 3.2474 | 3.0445  | 3.4923 |
| 258 | c1(c(cccc1)O)C(=O)N                                                                          | + | # | + | 3.933  | 3.4711 | 3.5958 | 3.6743 | + | * | + | 3.198  | 2.9674 | 4.9929  | 3.593  |
| 259 | c1(nc(nc(n1)N)N)NC1CC1                                                                       | + | + | * | 3.92   | 4.4345 | 3.8516 | 4.0169 | # | - | - | 3.549  | 3.2433 | 2.2874  | 1.7737 |
| 260 | [nH]1c(=O)cc[nH]c1=O                                                                         | # | # | - | 1.618  | 2.6474 | 3.7305 | 2.1559 | - | + | * | 1.301  | 2.0331 | 2.7882  | 3.3126 |
| 261 | C(CCC)CC=O                                                                                   | * | # | + | 3.6785 | 3.7631 | 3.0077 | 3.2035 | - | * | + | 3.432  | 3.1249 | 3.8073  | 3.8713 |
| 262 | c12c(ccc1C=O)cccc2                                                                           | * | # | * | 4.5124 | 4.6682 | 3.2807 | 4.3688 | + | - | * | 4.152  | 3.6301 | 3.7166  | 4.0771 |
| 263 | c12c(ccc(c1)C=O)cccc2                                                                        | + | * | # | 4.478  | 4.0094 | 4.9271 | 4.4173 | - | + | * | 4.018  | 3.5906 | 5.7227  | 4.7987 |
| 264 | c1(ccc(cc1)C(C)(C)C)[C@@H](CN1CCCC1)C                                                        | # | + | - | 6.006  | 5.761  | 4.2169 | 5.6022 | * | # | - | 5.3577 | 4.61   | 4.6615  | 4.7239 |
| 265 | c1(Oc2cccc2)ccc(cc1)C=O                                                                      | + | + | * | 5.143  | 5.3887 | 6.4904 | 5.7376 | # | + | + | 4.675  | 4.4493 | 2.5056  | 2.6662 |
| 266 | C([N+](C)(C)CO)^[Cl-]                                                                        | + | + | + | 3.421  | 2.5013 | 4.8855 | 3.2929 | * | - | - | 2.9519 | 2.3458 | 1.7713  | 1.8101 |
| 267 | C(=O)(C)C                                                                                    | - | - | * | 1.28   | 2.7854 | 2.1244 | 2.3013 | - | * | - | 0.957  | 1.7206 | 3.2622  | 3.1472 |
| 268 | C(Cl)(Cl)Cl                                                                                  | * | + | * | 3.1556 | 4.4287 | 2.444  | 3.3719 | + | + | * | 2.927  | 2.805  | 0.7012  | 1.52   |
| 269 | S(=O)(C)C                                                                                    | + | - | + | 0.538  | 1.5011 | 3.6391 | 0.8717 | # | + | - | 0.31   | 1.2843 | 3.6001  | 3.1325 |
| 270 | C(=O)(C(Cl)Cl)N                                                                              | + | - | # | 3.852  | 4.0856 | 0.7014 | 4.2887 | - | - | + | 2.454  | 3.4172 | 2.0836  | 2.3768 |
| 271 | N(C(=O)C)(CC)CC                                                                              | + | * | - | 2.036  | 3.3138 | 4.0622 | 2.9839 | + | + | # | 1.687  | 2.37   | 2.9619  | 2.207  |
| 272 | c12c(c(=O)[nH]c(=O)[nH]2)[nH]c(=O)[nH]1                                                      | * | * | - | 3.1725 | 4.6481 | 2.4312 | 3.3108 | - | * | + | 3.013  | 2.3027 | 3.5455  | 2.6601 |
| 273 | C1(=O)[C@H]2[C@H]3[C@H]1[C@@H](C2)C3                                                         | # | # | - | 3.116  | 3.8651 | 3.6404 | 3.4555 | * | # | - | 2.8524 | 3.8167 | 5.6604  | 5.5399 |
| 274 | c1(cc(cc1)Cl)Cl)NC(=O)CC                                                                     | + | # | - | 7.77   | 5.521  | 3.107  | 5.6739 | + | - | * | 6.441  | 5.0143 | 2.6192  | 1.8334 |
| 275 | C(=O)([C@@H](N)Cc1c[nH]cn1)O                                                                 | - | - | # | 3.182  | 3.2505 | 6.1056 | 2.606  | * | * | - | 2.1301 | 1.9194 | 5.4435  | 4.1931 |
| 276 | NCCCNCCCCNCCCN                                                                               | - | * | - | 5.625  | 6.6048 | 2.4902 | 5.8426 | + | * | # | 4.683  | 5.1077 | 1.1215  | 0.5441 |
| 277 | [N+](CC)(CC)(CC)CC^-[Br-]                                                                    | + | + | + | 3.108  | 3.7039 | 5.5545 | 3.4726 | - | # | * | 2.785  | 1.2802 | 7.4589  | 6.8535 |
| 278 | c1(C[N+](CCCCCCCC)(C)C)cccc1^-[Br-]                                                          | + | * | + | 6.381  | 6.8244 | 1.8996 | 6.9088 | - | * | - | 5.886  | 7.0646 | 6.4827  | 6.5024 |
| 279 | c1(nc(NC(C)C)nc(n1)SC)NC(C)C                                                                 | + | # | + | 7.519  | 7.0829 | 7.5653 | 7.547  | # | + | + | 6.956  | 6.7271 | 5.2054  | 5.4719 |
| 280 | C(CCCCN)CCCC                                                                                 | - | - | - | 7.365  | 5.9173 | 7.0597 | 5.3648 | - | * | - | 6.868  | 5.4443 | 3.1163  | 3.2596 |
| 281 | n1enc2c(c1N)[nH]cn2                                                                          | # | - | # | 4.212  | 3.6188 | 5.8407 | 3.2876 | + | - | * | 3.639  | 3.4628 | 5.8294  | 7.2867 |
| 282 | c12c(sc(n1)OCC(=O)N(c1cccc1)C)cccc2                                                          | + | # | # | 7.132  | 6.9451 | 4.0324 | 6.992  | # | + | + | 6.077  | 4.7181 | 3.4597  | 2.7047 |
| 283 | c12c(c(=O)[nH]c(n1)N)nc[nH]2                                                                 | * | - | + | 4.4085 | 4.1308 | 5.8669 | 3.7517 | * | - | + | 3.4633 | 3.3294 | 6.0179  | 6.2015 |
| 284 | c1(ccc(cc1)N=[N+]=[N-])N=C=S                                                                 | * | - | - | 6.4519 | 6.1829 | 4.1739 | 6.4789 | * | # | # | 6.1228 | 5.5769 | 2.7118  | 2.5887 |
| 285 | C(Cl)Cl                                                                                      | + | # | * | 2.863  | 2.6474 | 6.0872 | 3.4133 | + | * | # | 2.641  | 2.5872 | 2.3406  | 3.14   |
| 286 | C(C)(C)O                                                                                     | * | * | # | 2.9109 | 2.954  | 3.0487 | 2.6308 | + | + | # | 2.718  | 1.7871 | 3.342   | 3.4903 |
| 287 | N(CCCC)(CCCC)C=O                                                                             | * | - | * | 3.3515 | 3.9434 | 2.3317 | 3.6317 | - | - | # | 2.862  | 3.3694 | 2.276   | 2.9118 |
| 288 | O(C(C)(C)C)C=O                                                                               | * | * | - | 1.8133 | 2.6257 | 3.9018 | 1.9607 | + | + | - | 1.64   | 1.7623 | 4.3587  | 3.9973 |
| 289 | c12c(cc(c(e1)N)N)cccc2                                                                       | # | * | + | 5.12   | 4.7485 | 2.7089 | 4.329  | - | + | - | 4.546  | 3.8387 | 3.8418  | 3.9371 |
| 290 | c1(C(=O)c2cccc2)ccc(cc1)C[N+](C)(C)C^-[Cl-]                                                  | # | * | * | 4.326  | 4.7981 | 4.6703 | 5.6801 | * | - | + | 3.9583 | 4.4308 | 2.5071  | 2.8586 |
| 291 | C(=O)(C=C)N                                                                                  | + | + | + | 2.65   | 3.4911 | 4.7772 | 3.7559 | - | + | * | 2.341  | 2.3786 | 5.4635  | 5.9154 |
| 292 | c1(c(S(=O)(=O)NC(=O)Nc2nc(nc(n2)C)OC)ccs1)C(=O)OC                                            | + | # | * | 6.333  | 6.7163 | 2.7261 | 6.2501 | # | + | # | 5.287  | 4.4407 | 4.3735  | 3.6581 |
| 293 | c1(ccc(cc1)S(=O)(=O)N(N=O)C)C                                                                | + | + | # | 5.252  | 4.4224 | 6.7687 | 5.0956 | + | + | # | 4.826  | 4.0316 | 6.4503  | 6.1595 |
| 294 | [Zn]^+[Mn]^+C(CSC(=S)N)SC(=S)N                                                               | * | + | - | 6.7473 | 6.6332 | 5.0471 | 6.7791 | # | * | + | 6.181  | 5.304  | 1.5441  | 2.0873 |
| 295 | C1(=O)N(CCN1C)C                                                                              | - | - | # | 1.733  | 2.6898 | 6.3611 | 1.4756 | * | * | + | 1.4964 | 2.447  | 1.8726  | 1.6064 |
| 296 | c1(c2c(c(S(=O)(=O)O)ccc2)ccc1)                                                               | # | + | - | 1.504  | 1.7793 | 2.4944 | 1.4996 | + | - | # | 1.267  | 1.5706 | 7.0538  | 6.6182 |
