# Supplementary material for: Ecotoxicological prediction of organic chemicals toward Pseudokirchneriella subcapitata by Monte Carlo approach
Source: Royal Society of Chemistry journal article supplement (doi:10.1039/d2ra03936b), 2022-01-01
Supplement: d2ra03936b2.xlsx [file d2ra03936b2.xlsx]

## Sheet: Sheet1
One-Sample Kolmogorov-Smirnov Test
			Res. pIC10-1	Res. pIC10-2	Res. pIC10-3	Res. pIC50-1	Res. pIC50-2	Res. pIC50-3
N			334	334	334	334	334	334
Normal Parametersa,b	Mean		-0.14271	0.0234503	0.0363961	0.049974	0.026891	-0.00108204
	Std. Deviation		0.715823	0.689077	0.635285	0.713511	0.706352	0.645194
Most Extreme Differences	Absolute		0.0579087	0.0330893	0.0516929	0.031775	0.0315505	0.0396194
	Positive		0.0579087	0.0330893	0.0516929	0.031775	0.0315505	0.0396194
	Negative		-0.0367867	-0.0299623	-0.0309593	-0.0197142	-0.0180244	-0.0206561
Test Statistic			0.0579087	0.0330893	0.0516929	0.031775	0.0315505	0.0396194
Asymp. Sig. (2-tailed)			.009c	.200c,e	.032c	.200c,e	.200c,e	.200c,e
Monte Carlo Sig. (2-tailed)	Sig.		.204d	.848d	.322d	.880d	.885d	.654d
	95% Confidence Interval	Lower Bound	0.196496	0.840658	0.312941	0.873222	0.87844	0.644173
		Upper Bound	0.212304	0.854742	0.331259	0.885978	0.89096	0.662827
a. Test distribution is Normal.
b. Calculated from data.
c. Lilliefors Significance Correction.
d. Based on 10000 sampled tables with starting seed 1335104164.
e. This is a lower bound of the true significance.
